# Supplementary material
Source: MDPI journal article supplement (https://www.mdpi.com/2311-7524/8/12/1150)
Supplement: s1 [file s1]

**Supplementary Table S1.** Basal Medium (BM) composition

| Chemical compound                              | mg · L <sup>-1</sup> |
|------------------------------------------------|----------------------|
| Ammonium nitrate                               | 1650                 |
| Calcium chloride, anhydrous                    | 450                  |
| Magnesium sulfate, anhydrous                   | 370                  |
| Potassium phosphate, monobasic                 | 170                  |
| Potassium nitrate                              | 1900                 |
| Boric acid                                     | 10                   |
| FeNaEDTA                                       | 40                   |
| Manganese sulfate · H <sub>2</sub> O           | 25                   |
| Molybdc acid (sodium salt) · 2H <sub>2</sub> O | 0.25                 |
| Zinc sulfate · 7H <sub>2</sub> O               | 10                   |
| Copper sulfate · 5H <sub>2</sub> O             | 0.025                |
| Thiamine-HCl                                   | 0.4                  |
| Myo-inositol                                   | 100                  |
